# Supplementary material for: Two excellent phase-matchable infrared nonlinear optical materials based on 3D diamond-like frameworks: RbGaSn2Se6 and RbInSn2Se6
Source: Royal Society of Chemistry journal article supplement (doi:10.1039/c7dt01384a), 2017-01-01
Supplement: c7dt01384a1.pdf [file c7dt01384a1.pdf]

### Electronic Supplementary Information

## Two excellent phase-matchable infrared nonlinear-optical materials based on the 3D diamond-like frameworks:

### RbGaSn<sub>2</sub>Se<sub>6</sub> and RbInSn<sub>2</sub>Se<sub>6</sub>

Hua Lin,<sup>a,b</sup> Hong Chen,<sup>a,b</sup> Yu-Jun Zheng,<sup>a,b,c</sup> Ju-Song Yu,<sup>a,b,c</sup> Xin-Tao Wu,<sup>a</sup> and Li-Ming Wu<sup>\*,a,b</sup>

<sup>a</sup> State Key Laboratory of Structural Chemistry, Fujian Institute of Research on the Structure of Matter, Chinese Academy of Sciences, Fuzhou, Fujian 350002, People's Republic of China.

<sup>b</sup> Key Laboratory of Optoelectronic Materials Chemistry and Physics, Fujian Institute of Research on the Structure of Matter, Chinese Academy of Sciences, Fuzhou, Fujian 350002, People's Republic of China.

<sup>c</sup> University of Chinese Academy of Sciences, Beijing 100039, People's Republic of China.

\*E-mail: liming\_wu@fjirsm.ac.cn. Tel: (011)86-591-63173130.

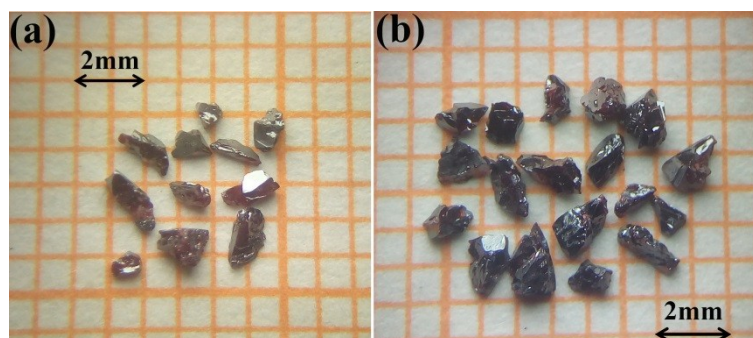

Figure S1 The photograph of the (a) RbGaSn<sub>2</sub>Se<sub>6</sub> and (b) RbInSn<sub>2</sub>Se<sub>6</sub> crystals.

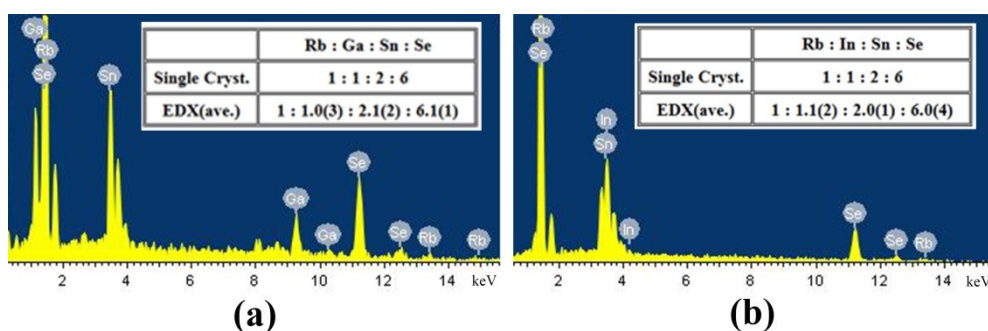

Figure S2 EDX result of (a) RbGaSn<sub>2</sub>Se<sub>6</sub> and (b) RbInSn<sub>2</sub>Se<sub>6</sub>.

### Electronic Supplementary Information

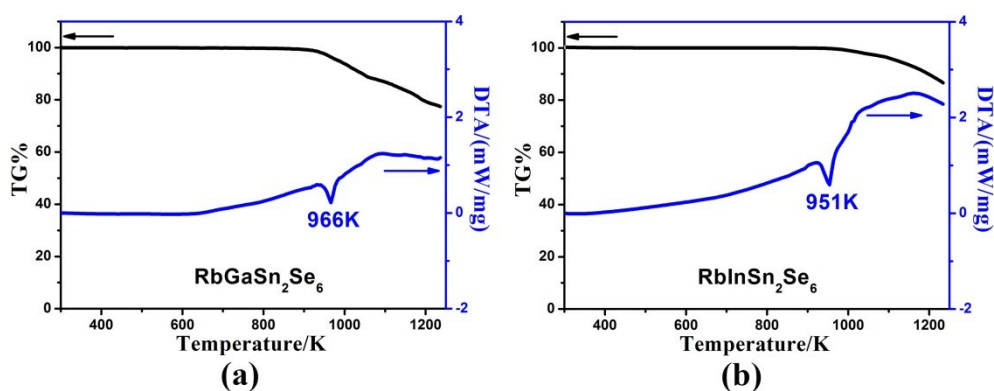

**Figure S3** TG (black) and DTA (blue) diagrams of (a) RbGaSn<sub>2</sub>Se<sub>6</sub> and (b) RbInSn<sub>2</sub>Se<sub>6</sub>.

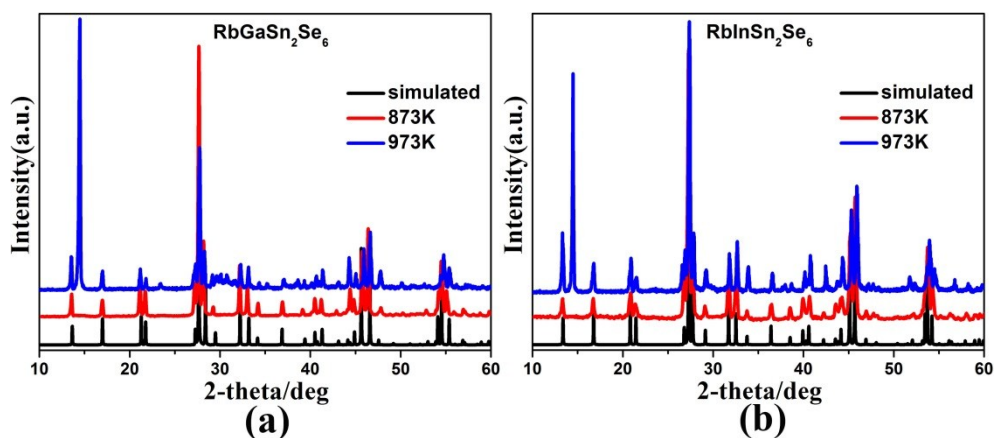

**Figure S4** The PXRD patterns of sample of (a) RbGaSn<sub>2</sub>Se<sub>6</sub> and (b) RbInSn<sub>2</sub>Se<sub>6</sub> heated at 873K (red), 973K (blue) and the simulated one (black). The sample heated at 873K was still single phased but decomposed at 973K.

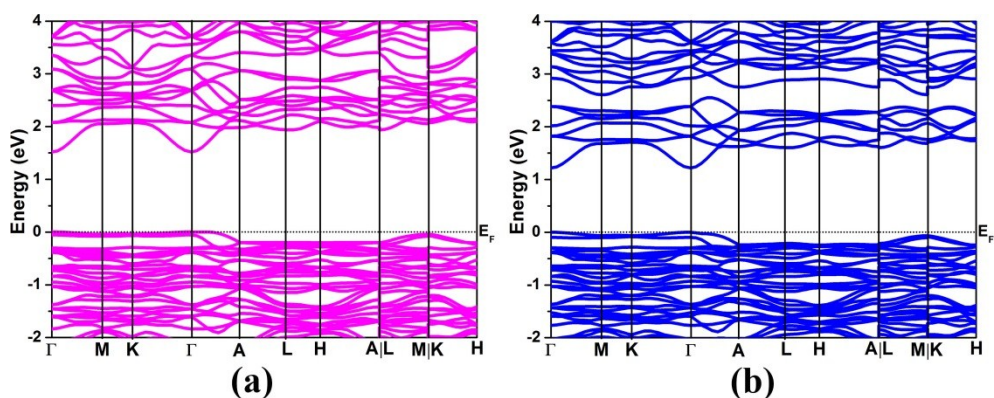

**Figure S5** Calculated band structure of (a) RbGaSn<sub>2</sub>Se<sub>6</sub> and (b) RbInSn<sub>2</sub>Se<sub>6</sub>, the Fermi level is set at 0.0 eV.

## Electronic Supplementary Information

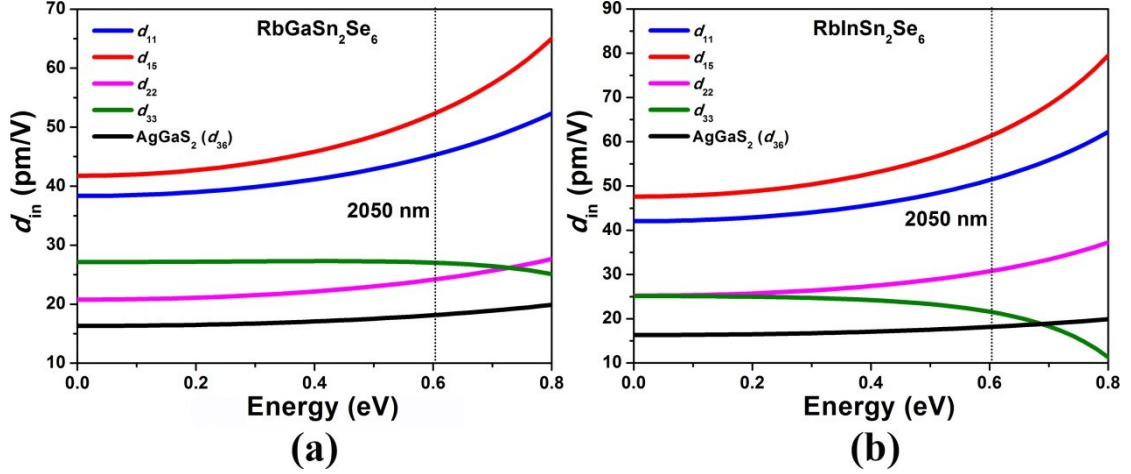

**Figure S6** Calculated frequency-dependent NLO coefficients for (a) RbGaSn<sub>2</sub>Se<sub>6</sub> and (b) RbInSn<sub>2</sub>Se<sub>6</sub>. Those of AgGaS<sub>2</sub> are shown as a reference (black line).

**Table S1.** Atomic coordinates and equivalent isotropic displacement parameters of RbXSn<sub>2</sub>Se<sub>6</sub> (X = Ga, In).

| Atom                                | Wyck. | $x$        | $y$        | $z$        | $U_{(eq)}(\text{\AA}^2)**$ |
|-------------------------------------|-------|------------|------------|------------|----------------------------|
| RbGaSn <sub>2</sub> Se <sub>6</sub> |       |            |            |            |                            |
| Rb                                  | 3a    | 0          | 0          | 0.2597(2)  | 0.0406(4)                  |
| M=Ga/Sn*                            | 9b    | 0.37694(5) | 0.47809(5) | 0.34653(9) | 0.0155(2)                  |
| Se1                                 | 9b    | 0.41566(8) | 0.27103(8) | 0.27453(7) | 0.0193(2)                  |
| Se2                                 | 9b    | 0.13537(8) | 0.42243(7) | 0.24720(9) | 0.0199(2)                  |
| RbInSn <sub>2</sub> Se <sub>6</sub> |       |            |            |            |                            |
| Rb                                  | 3a    | 0          | 0          | 0.0028(2)  | 0.0466(4)                  |
| M=In/Sn*                            | 9b    | 0.04593(5) | 0.23469(5) | 0.42178(7) | 0.0169(2)                  |
| Se1                                 | 9b    | 0.24616(8) | 0.19808(9) | 0.3192(2)  | 0.0236(2)                  |
| Se2                                 | 9b    | 0.41710(9) | 0.14929(8) | 0.01757(8) | 0.0237(2)                  |

\*The M site is disordered by 0.33 Ga (or In) and 0.67 Sn.

\*\* $U_{(eq)}$  is defined as one-third of the trace of the orthogonalized  $U_{ij}$  tensor.

*Electronic Supplementary Information*

**Table S2.** Selected bond lengths (Å) of RbXSn<sub>2</sub>Se<sub>6</sub> (X = Ga, In).

|          | RbGaSn <sub>2</sub> Se <sub>6</sub> | RbInSn <sub>2</sub> Se <sub>6</sub> |
|----------|-------------------------------------|-------------------------------------|
| M–Se1    | 2.4842(2)                           | 2.5428(2)                           |
| M–Se1    | 2.4916(9)                           | 2.5443(9)                           |
| M–Se2    | 2.4796(9)                           | 2.5422(2)                           |
| M–Se2    | 2.4858(2)                           | 2.5471(9)                           |
| Rb–Se1×3 | 3.8290(9)                           | 3.8840(2)                           |
| Rb–Se1×3 | 3.8378(2)                           | 3.8844(9)                           |
| Rb–Se2×3 | 3.8439(2)                           | 3.8877(2)                           |
| Rb–Se2×3 | 3.9135(8)                           | 3.9462(8)                           |
